# Supplementary material for: Automatic design of decision-tree induction algorithms tailored to flexible-receptor docking data
Source: Springer Nature journal article supplement (doi:10.1186/1471-2105-13-310), 2012-11-21
Supplement: 12859_2012_5549_MOESM4_ESM.pdf [file 12859_2012_5549_MOESM4_ESM.pdf]

ILE15 <= 13.369341: REGULAR

ILE15 > 13.369341

ASN159 <= 4.971942: EXCELLENT

ASN159 > 4.971942

LEU218 <= 2.634888

PHE41 <= 26.212636

LYS233 <= 14.247398: GOOD

LYS233 > 14.247398: REGULAR

PHE41 > 26.212636: REGULAR

LEU218 > 2.634888

ILE258 <= 10.812041

VAL163 <= 11.450211

TRP230 <= 9.615255

ILE120 <= 15.723714

MET232 <= 6.761114: GOOD

MET232 > 6.761114

ASP223 <= 6.154816

GLN66 <= 22.197911: EXCELLENT

GLN66 > 22.197911

ILE25 <= 15.96484

GLU220 <= 7.167261: GOOD

GLU220 > 7.167261: EXCELLENT

ILE25 > 15.96484: GOOD (17.0/7.0)

ASP223 > 6.154816

VAL12 <= 20.851697

VAL238 <= 7.831979: REGULAR

VAL238 > 7.831979: GOOD

VAL12 > 20.851697

GLU169 <= 9.287935: GOOD

GLU169 > 9.287935: REGULAR

ILE120 > 15.723714

ALA124 <= 13.606606: GOOD

ALA124 > 13.606606: REGULAR

TRP230 > 9.615255: REGULAR

VAL163 > 11.450211

GLY263 <= 6.084192: EXCELLENT

GLY263 > 6.084192: REGULAR

ILE258 > 10.812041

GLN267 <= 4.437864

ILE25 <= 16.747889: REGULAR

ILE25 > 16.747889: GOOD

GLN267 > 4.437864

PRO193 <= 6.040893

GLY192 <= 5.899623: REGULAR

GLY192 > 5.899623

ILE120 <= 14.721393: GOOD

ILE120 > 14.721393: REGULAR

PRO193 > 6.040893: REGULAR
