# Supplementary figures and images for: Automatic design of decision-tree induction algorithms tailored to flexible-receptor docking data
Source: Springer Nature journal article supplement (doi:10.1186/1471-2105-13-310), 2012-11-21

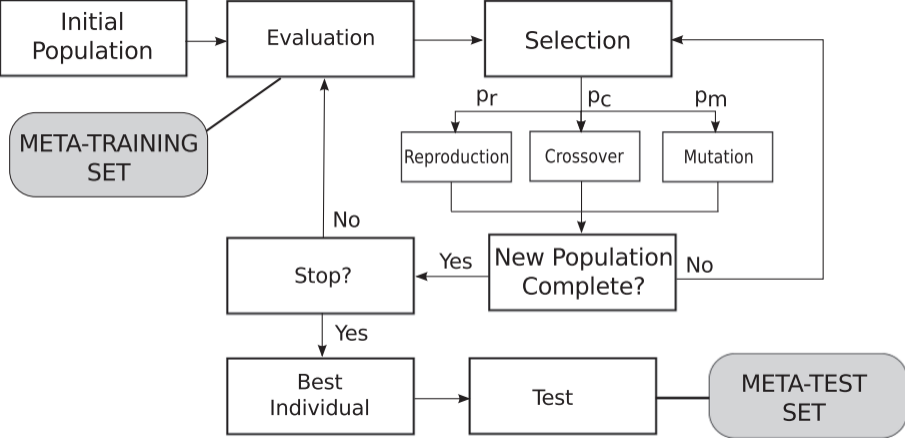

Supplement: 12859_2012_5549_MOESM2_ESM.pdf [file 12859_2012_5549_MOESM2_ESM.pdf]

individuals

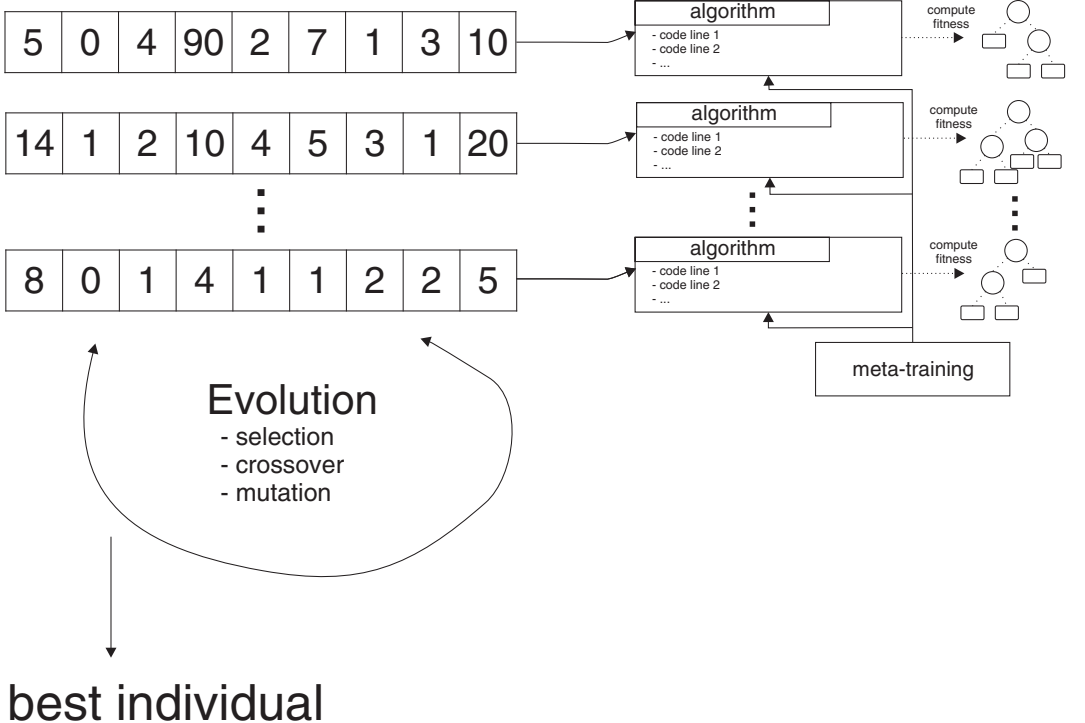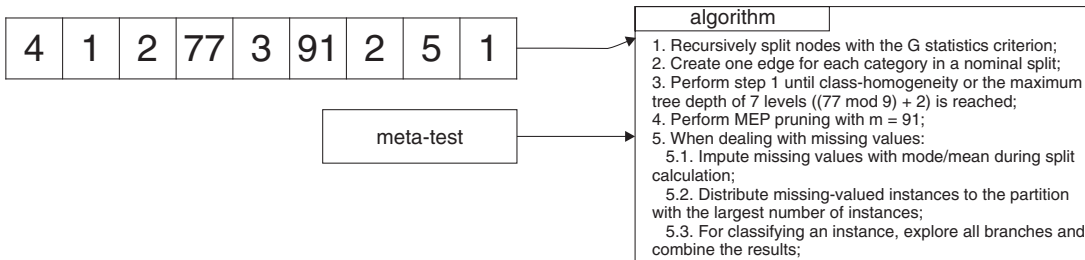

Supplement: 12859_2012_5549_MOESM3_ESM.pdf [file 12859_2012_5549_MOESM3_ESM.pdf]
